# Supplementary material
Source: publisher figshare collection journal article supplement (https://diabetesjournals.figshare.com/articles/dataset/_/26972962)
Supplement: Supplementary file 2 [file 1]

## Supplementary Appendix

### The Relationship between Average Glucose Levels and HbA1c Differs Across Racial Groups:

#### A Sub-study of the GRADE Randomized Trial

David M. Nathan, William H. Herman, Mary E. Larkin, Heidi Krause-Steinrauf, Hiba AbouAssi, Andrew J. Ahmann, Janet Brown, Daniel S. Hsia, Tasma Harindhanavudhi, Mary Johnson, Valerie L. Arends, Nicole M. Butera, Samuel P. Rosin, John M. Lachin, and Naji Younes,  
for the GRADE Study Research Group

## Table of Contents

|                                                                                                                                                                                                                                                                                                            |    |
|------------------------------------------------------------------------------------------------------------------------------------------------------------------------------------------------------------------------------------------------------------------------------------------------------------|----|
| A. Item S1: GRADE Research Group Members .....                                                                                                                                                                                                                                                             | 2  |
| B. Table S1: Discontinuation of study medications and use of non-study medications by racial/ethnic group.....                                                                                                                                                                                             | 6  |
| C. Figure S1: CONSORT Diagram .....                                                                                                                                                                                                                                                                        | 7  |
| D. Figure S2: Relationship between HbA1c and glycated albumin with average glucose calculated from 10 days of CGM (mg/dL), with overlaid loess curves by race/ethnicity.....                                                                                                                               | 8  |
| E. Figure S3: Scatterplot of HbA1c vs. AG10 by age(top) and by sex (bottom), with age-specific (top) and sex-specific (bottom) regression lines overlaid .....                                                                                                                                             | 9  |
| F. Table S2: Racial/ethnic differences in the relationships between glycated albumin (%) and average glucose calculated from 10 days of CGM (AG10; mg/dL) in a linear regression model .....                                                                                                               | 10 |
| G. Table S3: Racial/ethnic differences in the relationships between HbA1c (%) and average glucose (AG) calculated from 14 days of CGM (AG14; mg/dL), fasting plasma glucose (FPG) from the OGTT, and glucose area under the curve (AUC) from the OGTT in linear regression models .....                    | 11 |
| H. Figure S4: Relationship between HbA1c (%) and glycated albumin (%) with measures of glucose based on OGTT (mg/dL), with overlaid regression lines by race/ethnicity .....                                                                                                                               | 12 |
| I. Figure S5: Loess curves of the relationship of (A) HbA1c (%) and (B) glycated albumin (%) with fasting glucose levels (mg/dl) and of (C) HbA1c and (D) glycated albumin with area under the curve glucose derived from the oral glucose tolerance tests, all by race/ethnicity .....                    | 13 |
| J. Table S4. Racial/ethnic differences in the relationships between glycated albumin and average glucose (AG) calculated from 14 days of CGM (AG <sub>14</sub> ; mg/dL), fasting plasma glucose (FPG) from the OGTT, and glucose area under the curve (AUC) from the OGTT in linear regression models..... | 14 |
| K. Table S5. Predicted average glucose levels (AG <sub>10</sub> ; mmol/L) for given HbA1c (mmol/mol) by race/ethnicity .....                                                                                                                                                                               | 15 |
| L. Table S6. Predicted HbA1c levels (mmol/mol) for given AG <sub>10</sub> (mmol/L) by race/ethnicity.....                                                                                                                                                                                                  | 16 |

## A. Supplement Item S1: GRADE Research Group (April 30, 2021)

**Designations:** Principal Investigator (PI); Co-Principal Investigator (Co-PI); Co-Investigator (Co-I); Study Coordinator (SC); Recruitment/Retention Coordinator (RC); Research Staff (RS)

### Current Clinical Centers

**Albert Einstein College of Medicine:** Crandall, JP (PI); McKee, MD (Co-PI, past); Behringer-Massera, S (Co-I, past); Brown-Friday, J (SC); Xhori, E (RC, past); Ballentine-Cargill, K (RS); Duran, S (RS); Estrella, H (RS); Gonzalez de la torre, S (RS, past); Lukin, J (RS, past)

**Atlanta VA Medical Center:** Phillips, LS (PI); Burgess, E (Co-I); Olson, D (Co-I); Rhee, M (Co-I); Wilson, P (Co-I); Raines, TS (SC); Boers, J (SC); Costello, J (SC); Maher-Albertelli, M (SC); Mungara, R (SC); Savoye, L (SC, past); White, CA (SC); Gullett, C (SC, past); Holloway, L (SC, past); Morehead, F (SC, past); Person, S (SC, past); Sibymon, M (SC, past); Tanukonda, S (SC, past); Adams, C (RC, past); Ross, A (RC, past)

**Baylor College of Medicine:** Balasubramanyam, A (PI); Gaba, R (Co-I); Gonzalez Hattery, E (SC); Ideozu, A (SC); Jimenez, J (SC); Montes, G (RC); Wright, C (RS, past)

**Baylor Scott & White Research Institute (Baylor Research Institute):** Hollander, P (PI); Roe, E (Co-I, past); Jackson, A (SC); Smiley, A (SC); Burt, P (SC, past); Estrada, L (RS); Chionh, K (RS, past)

**Case Western Reserve University/Cleveland VA/MetroHealth Medical Center:** Ismail-Beigi, F (PI); Falck-Ytter, C (Co-PI); Sayyed Kassem, L (Co-PI); Sood, A (Co-PI, past); Tiktin, M (Co-I, SC); Kulow, T (SC); Newman, C (SC); Stancil, KA (SC); Cramer, B (SC, past); Iacoboni, J (SC, past); Kononets, MV (SC, past); Sanders, C (SC, past); Tucker, L (SC, past); Werner, A (SC, past); Maxwell, A (RS); McPhee, G (RS); Patel, C (RS); Colosimo, L (RS, past); Krol, A (RS, past)

**Columbia University Medical Center:** Goland, R (PI); Pring, J (SC); Alfano, L (SC); Kringas, P (SC, past); Hausheer, C (RC, past); Tejada, J (RC, past); Gumpel, K (RS, past); Kirpitch, A (RS, past); Schneier, H (RS, past)

**Duke University Medical Center:** Green, JB (PI); AbouAssi, H (Co-I); Chatterjee, R (Co-I); Feinglos, MN (Co-I, past); English Jones, J (SC, RC); Khan, SA (SC, RC); Kimpel, JB (SC, past); Zimmer, RP (SC, past); Furst, M (RC, past); Satterwhite, BM (RS); Thacker, CR (RS); Evans Kreider, K (RS, past)

**Indiana University:** Mariash, CN (PI); Mather, KJ (PI, past); Ismail, HM (Co-I); Lteif, A (Co-I, past); Mullen, M (SC); Hamilton, T (SC, past); Patel, N (SC, past); Riera, G (RC); Jackson, M (RC, past); Pirics, V (RC, past); Aguillar, D (RS, past); Howard, D (RS, past); Hurt, S (RS, past)

**International Diabetes Center:** Bergenstal, R (PI); Carlson, A (Co-I); Martens, T (Co-I); Johnson, M (SC); Hill, R (SC); Hyatt, J (SC); Jensen, C (SC); Madden, M (SC); Martin, D (SC); Willis, H (SC); Konerza, W (RS); Yang, S (RS); Kleeberger, K (RS, past); Passi, R (RS, past)

**Kaiser Permanente Northwest:** Fortmann, S (PI); Herson, M (Co-I); Mularski, K (Co-I); Glauber, H (Co-I, past); Prihoda, J (Co-I, past); Ash, B (SC); Carlson, C (SC); Ramey, PA (SC); Schield, E (SC); Torggrimson-Ojerio, B (SC); Arnold, K (SC, past); Kauffman, B (SC, past); Panos, E (SC, past); Sahnaw, S (RC); Bays, K (RS); Berame, K (RS); Cook, J (RS); Ghioni, D (RS); Gluth, J (RS); Schell, K (RS); Criscola, J (RS, past); Friason, C (RS, past); Jones, S (RS, past); Nazarov, S (RS, past)

**Kaiser Permanente of Georgia:** Barzilay, J (PI); Rassouli, N (Co-PI); Puttnam, R (Co-I); Ojoawo, B (SC); Nelson, R (RC); Curtis, M (SC, past); Hollis, B (SC, past); Sanders-Jones, C (SC, past); Stokes, K (SC, past); El-Haqq, Z (RS, past); Kolli, A (RS, past); Tran, T (RS, past)

**Massachusetts General Hospital:** Wexler, D (PI); Larkin, ME (Co-I, SC); Meigs, J (Co-I); Chambers, B (SC, past); Dushkin, A (SC, past); Rocchio, G (SC, past); Yepes, M (SC, past); Steiner, B (RC); Dulin, H (RC, past); Cayford, M (RS); Chu, K (RS); DeManbey, A (RS); Hillard, M (RS); Martin, K (RS); Thangthaeng, N (RS); Gurry, L (RS, past); Kochis, R (RS, past); Raymond, E (RS, past); Ripley, V (RS, past); Stevens, C (RS, past)

**MedStar Health Research Institute/ MedStar Baltimore:** Park, J (PI); Aroda, V (PI, past); Ghazi, A (Co-PI); Magee, M (Co-I); Rassing, Ann (Co-I); Loveland, A (SC); Hamm, M (SC); Hurtado, M (SC); Kuhn, A (SC); Leger, J (SC); Manandhar, L (SC); Mwicigi, F (SC); Sanchez, O (SC); Young, T (SC)

**Miami VA Healthcare System/University of Miami:** Garg, R (PI); Lagari-Libhaber, V (PI); Florez, HJ (PI, past); Valencia, WM (PI, past); Marks, J (Co-PI, past); Casula, S (Co-I); Oropesa-Gonzalez, L (SC); Hue, L (SC, past); Cuadot, A (SC, past); Nieto-Martinez, R (SC, past); Riccio Veliz, AK (SC, past); Gutt, M (RC, past); Kendal, YJ (RS, past); Veciana, B. (RS, past)

**Oregon Health & Science University:** Ahmann, A (PI); Aby-Daniel, D (Co-I); Joarder, F (Co-I); Morimoto, V (Co-I); Sprague, C (Co-I); Yamashita, D (Co-I); Cady, N (SC); Rivera-Eschright, N (SC); Kirchhoff, P (SC, past); Morales Gomez, B (RC); Adducci, J (RC, past); Goncharova, A (RC, past)

**Pacific Health Research and Education Institute/VA Pacific Islands:** Hox, SH (PI); Petrovitch, H (Co-PI); Matwichyna, M (SC); Jenkins, V (SC, past); Broadwater, L (RS); Ishii, RR (RS); Bermudez, NO (RS; past)

**Pennington Biomedical Research Center:** Hsia, DS (PI); Cefalu, WT (PI, past); Greenway, FL (Co-I); Waguespack, C (Co-I); King, E (SC); Fry, G (SC); Dragg, A (SC); Gildersleeve, B (SC); Arceneaux, J (SC); Haynes, N (SC, past); Thomassie, A (SC, past); Pavlionis, M (SC, past); Bourgeois, B (RC, past); Hazlett, C (RS)

**San Diego VA Medical Center:** Mudaliar, S (PI); Henry, R (PI, past); Boeder, S (Co-I, past); Pettus, J (Co-I, past); Diaz, E (SC); Garcia-Acosta, D (SC); Maggs, S (SC); DeLue, C (SC, past); Stallings, A (SC, past); Castro, E (RC, past); Hernandez, S (RC, past)

**Southwestern American Indian Center:** Krakoff, J (PI); Curtis, JM (Co-I); Killeen, T (SC); Khalid, M (SC); Joshevama, E (RC, past); Diaz, E (RS); Martin, D (RS); Tsingine, K (RS); Karshner, T (RS, past)

**St. Luke's-Roosevelt Hospital:** Albu, J (Co-PI); Pi-Sunyer, FX (Co-PI, past); Frances, S (Co-I); Maggio, C (SC, past); Ellis, E (RC); Bastawrose, J (RC, past); Gong, X (RS)

**SUNY Downstate Medical Center/New York Hospital-Queens:** Banerji, MA (PI); August, P (Co-I); Lee, M (Co-I); Lorber, D (Co-I); Brown, NM (SC, RC); Josephson, DH (SC); Thomas, LL (SC, RC); Tsovian, M (SC, RC); Cherian, A (SC, RC, past); Jacobson, MH (RS); Mishko, MM (RS)

**The University of North Carolina Diabetes Care Center:** Kirkman, MS (PI); Buse, JB (Co-I); Diner, J (Co-I); Dostou, J (Co-I); Machineni, S (Co-I); Young, L (Co-I); Bergamo, K (Co-I, past); Goley, A (Co-I, past); Kerr, J (Co-I, past); Largay, JF (Co-I, past); Guarda, S (SC); Cuffee, J (SC, past); Culmer, D (SC, past); Fraser, R (RC); Almeida, H (RC, past); Coffey, S (RC, past); Debnam, E (RC, past); Kiker, L (RC, past); Morton, S (RC, past); Josey, K (RS); Fuller, G (RS, past)

**University of Alabama Birmingham:** Garvey, WT (PI); Cherrington, AL (Co-PI); Dyer, D (SC); Lawson, MCR (SC); Griffith, O (SC, past); Agne, A (RC); McCullars, S (RC)

**University of Cincinnati/Cincinnati VA Medical Center:** Cohen, RM (PI); Craig, J (SC); Rogge, MC (SC, past); Burton, K (SC, past); Kersey, K (SC, RC, past); Wilson, C (SC, past); Lipp, S (RC, past); Vonder Meulen, MB (RC, past); Adkins, C (RS); Onadeko, T (RS)

**University of Colorado-Denver/VA:** Rasouli, N (PI); Baker, C (Co-I); Schroeder, E (Co-I, past); Razzaghi, M (Co-I); Lyon, C (Co-I, past); Penaloza, R (Co-I, past); Underkofler, C (SC); Lorch, R (SC); Douglass, S (SC, past); Steiner, S (SC, past)

**University of Iowa:** Sivitz, WI (PI); Cline, E (SC); Knosp, LK (SC); McConnell, J (SC, past); Lowe, T (RC)

**University of Michigan:** Herman, WH (PI); Pop-Busui, R (Co-PI); Tan, MH (Co-I); Martin, C (SC); Waltje, A (SC, RC); Katona, A (SC); Goodhall, L (SC, past); Eggleston, R (RC, past); Kuo, S (RS); Bojescu, S (RS, past); Bule, S (RS, past); Kessler, N (RS, past); LaSalle, E (RS, past); Whitley, K (RS, past)

**University of Minnesota:** Seaquist, ER (PI); Bantle, A (Co-I); Harindhanavudhi, T (Co-I); Kumar, A (Co-I); Redmon, B (Co-I); Bantle, J (Co-I, past); Coe, M (SC); Mech, M (SC); Taddese, A (RC); Lesne, L (RS); Smith, S (RS)

**University of Nebraska Medical Center/Omaha VA:** Desouza, C (PI); Kuechenmeister, L (Co-I); Shivaswamy, V (Co-I); Burbach, S (SC); Rodriguez, MG (SC); Seipel, K (SC); Alfred, A (SC, past); Morales, AL (SC, past); Eggert, J (RS); Lord, G (RS); Taylor, W (RS, past); Tillson, R (RS, past)

**University of New Mexico:** Schade, DS (PI); Adolphe, A (Co-PI); Burge, M (Co-PI, past); Duran-Valdez, E (SC); Martinez, J (RC, past); Bancroft, A (RS); Kunkel, S (RS); Ali Jamaledin Ahmad, F (RS, past); Hernandez McGinnis, D (RS, past); Pucchetti, B (RS, past); Scripsick, E (RS, past); Zamorano, A (RS, past)

**UT Health San Antonio:** DeFronzo, RA (PI); Cersosimo, E (Co-PI); Abdul-Ghani, M (Co-I); Triplitt, C (Co-I); Juarez, D (SC); Mullen, M (SC); Garza, RI (SC, past); Verastiqui, H (SC, past); Wright, K (RC, past); Puckett, C (RS)

**University of Texas-Southwestern Medical Center:** Raskin, P (PI); Rhee, C (Co-I, past); Abraham, S (SC); Jordan, LF (SC); Sao, S (SC); Morton, L (SC, past); Smith, O (SC, past); Osornio Walker, L (RC, past); Schnurr-Breen, L (RC, past); Ayala, R (RS); Kreymer, RB (RS); Sturgess, D (RS, past)

**VA Puget Sound Health Care System/University of Washington:** Utzschneider, KM (PI); Kahn, SE (Co-I); Alarcon-Casas Wright, L (Co-I); Boyko, EJ (Co-I); Tsai, EC (Co-I); Trence, DL (Co-I, past); Trikudanathan, S (Co-I, past); Fattaleh, BN (SC); Montgomery, BK (SC, past); Atkinson, KM (RS); Kozedub, A (RS); Concepcion, T (RS, past); Moak, C (RS, past); Prikhodko, N (RS, past); Rhothisen, S (RS, past)

**Vanderbilt University:** Elasy, TA (PI); Martin, S (SC); Shackelford, L (RC, RS, past); Goidel, R (RS); Hinkle, N (RS); Lovell, C (RS); Myers, J (RS); Lipps Hogan, J (RS, past)

**Washington University:** McGill, JB (PI); Salam, M (Co-I); Schweiger, T (SC, RC); Kissel, S (SC, RC, past); Recklein, C (SC, past); Clifton, MJ (RS)

**Yale University/Fair Haven Community Health Center/West Haven VA Medical Center:** Tamborlane, W (PI); Camp, A (Co-I); Gulanski, B (Co-I); Inzucchi, SE (Co-I); Pham, K (Co-I); Alguard, M (SC, RC); Gatcomb, P (SC); Lessard, K (SC); Perez, M (SC); Iannone, L (RC); Magenheimer, E (RC); Montosa, A (RC)

### **Study Units**

**NIH/NIDDK (Sponsor):** Cefalu, WT (Director, Division of Diabetes, Endocrinology and Metabolic Diseases); Fradkin, J (Director, Division of Diabetes, Endocrinology and Metabolic Diseases, past); Burch, HB (Project Scientist); Bremer, AA (Project Scientist, past)

**Chairman's Office, Massachusetts General Hospital, Harvard Medical School:** Nathan, DM (Study Chair, Study Co-PI)

**Executive Committee:** Nathan, DM (Study Chair, Study Co-PI); Lachin, JM (U01 Contact PI, Study Co-PI); Buse, JB (Co-I); Kahn, SE (Co-I); Krause-Steinrauf, H (Co-I, Project Director); Larkin, ME (Co-I, SC); Tiktin, M (Co-I, SC); Wexler, D (PI); Burch, HB (Program Scientist); Bremer, AA (Project Scientist, past)

**Coordinating Center, The George Washington University Biostatistics Center:** Lachin, JM (U01 Contact PI, Study Co-PI); Krause-Steinrauf, H (Co-I, Project Director); Younes, N (Co-I); Bebu, I (RS); Butera, N (RS); Buys, CJ (RS); Fagan, A (RS); Gao, Y (RS); Ghosh, A (RS); Gramzinski, MR (RS); Hall, SD (RS); Kazemi, E (RS); Legowski, E (RS); Liu, H (RS); Suratt, C (RS); Tripputi, M (RS); Arey, A (RS, past); Backman, M (RS, past); Bethupu, J (RS, past); Lund, C (RS, past); Mangat Dhaliwal, P (RS, past); McGee, P (RS, past); Mesimer, E (RS, past); Ngo, L (RS, past)

**Central Biochemical Laboratory, University of Minnesota Advanced Research and Diagnostic Laboratory:** Steffes, M (PI); Seegmiller, J (Co-I); Saenger, A (Co-I, past); Arends, V (SC); Gabrielson, D (SC, past)

**Drug Distribution Center, VA Cooperative Studies Program Clinical Research Pharmacy Coordinating Center:** Conner, T (PI); Warren, S (PI, past); Day, J (RS); Huminik, J (RS); Scrymgeour, A (RS)

**ECG Reading Center, EPICARE, Wake Forest University:** Soliman, EZ (PI); Pokharel, Y (PI, past), Zhang, ZM (Co-I, past); Campbell, C (SC); Hu, J (SC); Keasler, L (SC); Hensley, S (SC, past); Li, Y (RS)

### **Economic Evaluation and Assessment Center:**

**University of Michigan:** Herman, WH (PI); Kuo, S (RS); Martin, C (SC); Waltje, A (SC, RC); Mihalcea, R (RS); Min, DJ (RS); Perez-Rosas, V (RS); Prosser, L (RS); Resnicow, K (RS); Ye, W (RS)

**Centers for Disease Control and Prevention:** Shao, H (RS); Zhang, P (RS)

**Neurocognitive Coordinating Center, Columbia University Medical Center:** Luchsinger, J (PI); Sanchez, D (SC); Assuras, S (RS)

**QWB Reading Center, University of California San Diego Health Services Research Center:** Groessl, E (PI); Sakha, F (SC); Chong, H (SC, past); Hillery, N (RS)

## **Collaborators**

**Cardiovascular Adjudication Advisor:** Everett, BM (Brigham and Women's Hospital)

**Collaborating Investigators (Recruitment Sites):** Abdouch, I (University of Nebraska Medical Center/Omaha VA); Bahtiyar, G (SUNY Downstate Medical Center); Brantley, P (Pennington Biomedical Research Center (LSU)); Broyles, FE (Swedish Medical Center); Canaris, G (University of Nebraska Medical Center/Omaha VA); Copeland, P (Massachusetts General Hospital); Craine, JJ (UW Valley Medical Center); Fein, WL (Swedish Medical Center); Gliwa, A (SUNY Downstate Medical Center); Hope, L (SUNY Downstate Medical Center); Lee, MS (SUNY Downstate Medical Center); Meiners, R (Pennington Biomedical Research Center (LSU)); Meiners, V (Pennington Biomedical Research Center (LSU)); O'Neal, H (Pennington Biomedical Research Center (LSU)); Park, JE (UW Valley Medical Center); Sacerdote, A (SUNY Downstate Medical Center); Sledge, Jr., E (Pennington Biomedical Research Center (LSU)); Soni, L (SUNY Downstate Medical Center); Steppel-Reznik, J (Massachusetts General Hospital); Turchin, A (Massachusetts General Hospital)

**Beta Cell Ancillary Study:** Brooks-Worrell, B (University of Washington); Hampe, CS (University of Washington); Palmer, JP (University of Washington); Shojaie, A (University of Washington)

**Continuous Glucose Monitoring Sub-study:** Higgins, J (Massachusetts General Hospital; Harvard Medical School)

**Emotional Distress Sub-study:** Golden, S (Johns Hopkins University); Gonzalez, J (Yeshiva University; Albert Einstein College of Medicine); Naik, A (Baylor College of Medicine); Walker, E (Albert Einstein College of Medicine)

**National Diabetes Education Program (NDEP) Sub-study:** Doner Lotenberg, L (Hager Sharp); Gallivan, JM (National Institutes of Health); Lim, J (Hager Sharp); Tuncer, DM (National Institutes of Health)

**Recruitment Ancillary Study:** Behringer-Massera, S (The Mount Sinai Hospital, Beth Israel Medical Center)

## B. Supplement Table S1. Discontinuation of study medications and use of non-study medications by racial/ethnic group

|                                                                                                                                                                    | All<br>(n=1454) | Non-Hispanic White<br>(n=534) | Non-Hispanic Black<br>(n=389) | Hispanic White<br>(n=327) | Other races<br>(n=204) | p-value* |
|--------------------------------------------------------------------------------------------------------------------------------------------------------------------|-----------------|-------------------------------|-------------------------------|---------------------------|------------------------|----------|
| Permanent discontinuation of study medications up until CGM completion <sup>†</sup>                                                                                | 138 (9.5%)      | 35 (6.6%)                     | 45 (11.6%)                    | 28 (8.6%)                 | 30 (14.7%)             | 0.003    |
| Use of non-study medications up until CGM completion <sup>‡</sup>                                                                                                  | 89 (6.1%)       | 23 (4.3%)                     | 31 (8.0%)                     | 17 (5.2%)                 | 18 (8.8%)              | 0.038    |
| Permanent discontinuation of study medications <sup>†</sup> and/or use of non-study medications <sup>‡</sup> up until CGM completion                               | 193 (13.3%)     | 48 (9.0%)                     | 66 (17.0%)                    | 39 (11.9%)                | 40 (19.6%)             | <0.001   |
| Use of non-study meds at time of CGM completion <sup>‡</sup>                                                                                                       | 47 (3.2%)       | 14 (2.6%)                     | 13 (3.3%)                     | 9 (2.8%)                  | 11 (5.4%)              | 0.270    |
| Proportion of participants with a change in therapy in the ~90 days prior to performance of CGM <sup>a</sup>                                                       |                 |                               |                               |                           |                        |          |
| New discontinuation of study medications <sup>b</sup>                                                                                                              | 35 (2.4%)       | 8 (1.5%)                      | 7 (1.8%)                      | 13 (4.0%)                 | 7 (3.6%)               | 0.074    |
| Change in non-study medications <sup>c</sup>                                                                                                                       | 22 (1.5%)       | 5 (0.9%)                      | 7 (1.8%)                      | 5 (1.5%)                  | 5 (2.5%)               | 0.439    |
| Addition of per-protocol rescue insulin <sup>d</sup>                                                                                                               | 36 (2.5%)       | 12 (2.3%)                     | 9 (2.3%)                      | 9 (2.8%)                  | 6 (3.0%)               | 0.919    |
| New discontinuation of study medications <sup>b</sup> , change in non-study medications <sup>c</sup> , and/or addition of per-protocol rescue insulin <sup>d</sup> | 90 (6.3%)       | 23 (4.4%)                     | 23 (6.0%)                     | 26 (8.0%)                 | 18 (9.1%)              | 0.050    |

CGM- continuous glucose monitoring.

Other races- Asian American and Pacific Islanders, American Indian or race not identified.

\* p-value from a chi-square test for differences in proportions among the four racial/ethnic groups.

<sup>†</sup> Permanent discontinuation of any of the protocol-specified study medications. This can include discontinuation of metformin, randomized study medication, and/or rescue insulin (if required per protocol due to meeting secondary/tertiary outcome). This does not include per protocol discontinuation of the randomized study medication due to meeting the secondary/tertiary outcome.

<sup>‡</sup> This does not include the use of non-study versions of an assigned study medication.

<sup>a</sup> Assessed changes in therapy between the quarterly study visits before and after the CGM period. Excludes n=20 (1.4%) participants who were missing either the most recent quarterly visit prior to CGM or the next visit following CGM.

<sup>b</sup> Stopping either metformin (does not count as a metformin discontinuation if participant is taking non-study metformin) and/or the randomly assigned medication between the study visits before and after the CGM.

<sup>c</sup> Change in use of any of the non-study glucose-lowering/diabetes medications between the study visits before and after the CGM (e.g., using a non-study insulin at the visit before CGM but not at the visit after, not using a TZD at the visit before CGM but using a TZD at the visit after).

<sup>d</sup> Started either glargine and/or aspart insulin between the study visits before and after the CGM.

## C. Supplement Figure S1. CONSORT Figure

### Continuous Glucose Monitoring (CGM) Substudy

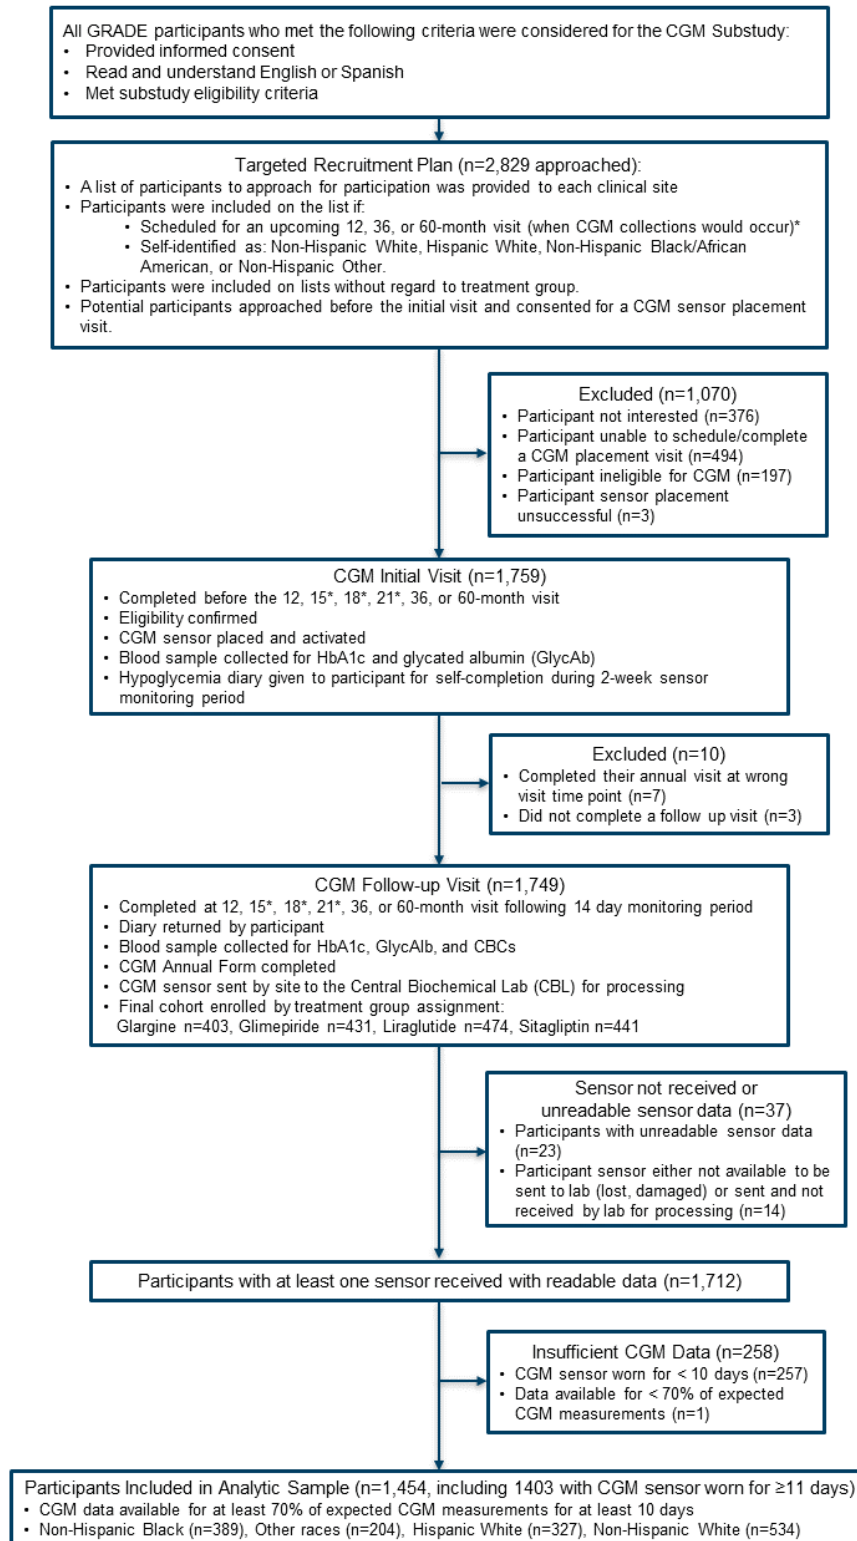

\*Due to low numbers of upcoming 12-month visits, lists expanded to include 15, 18, and 21-month visits starting in May 2018

**D. Supplement Figure S2. Relationship between HbA1c (top panel; %) and glycated albumin (bottom panel; %) with average glucose calculated from 10 days of CGM (mg/dL), with overlaid loess curves by race/ethnicity (n=1,454).**

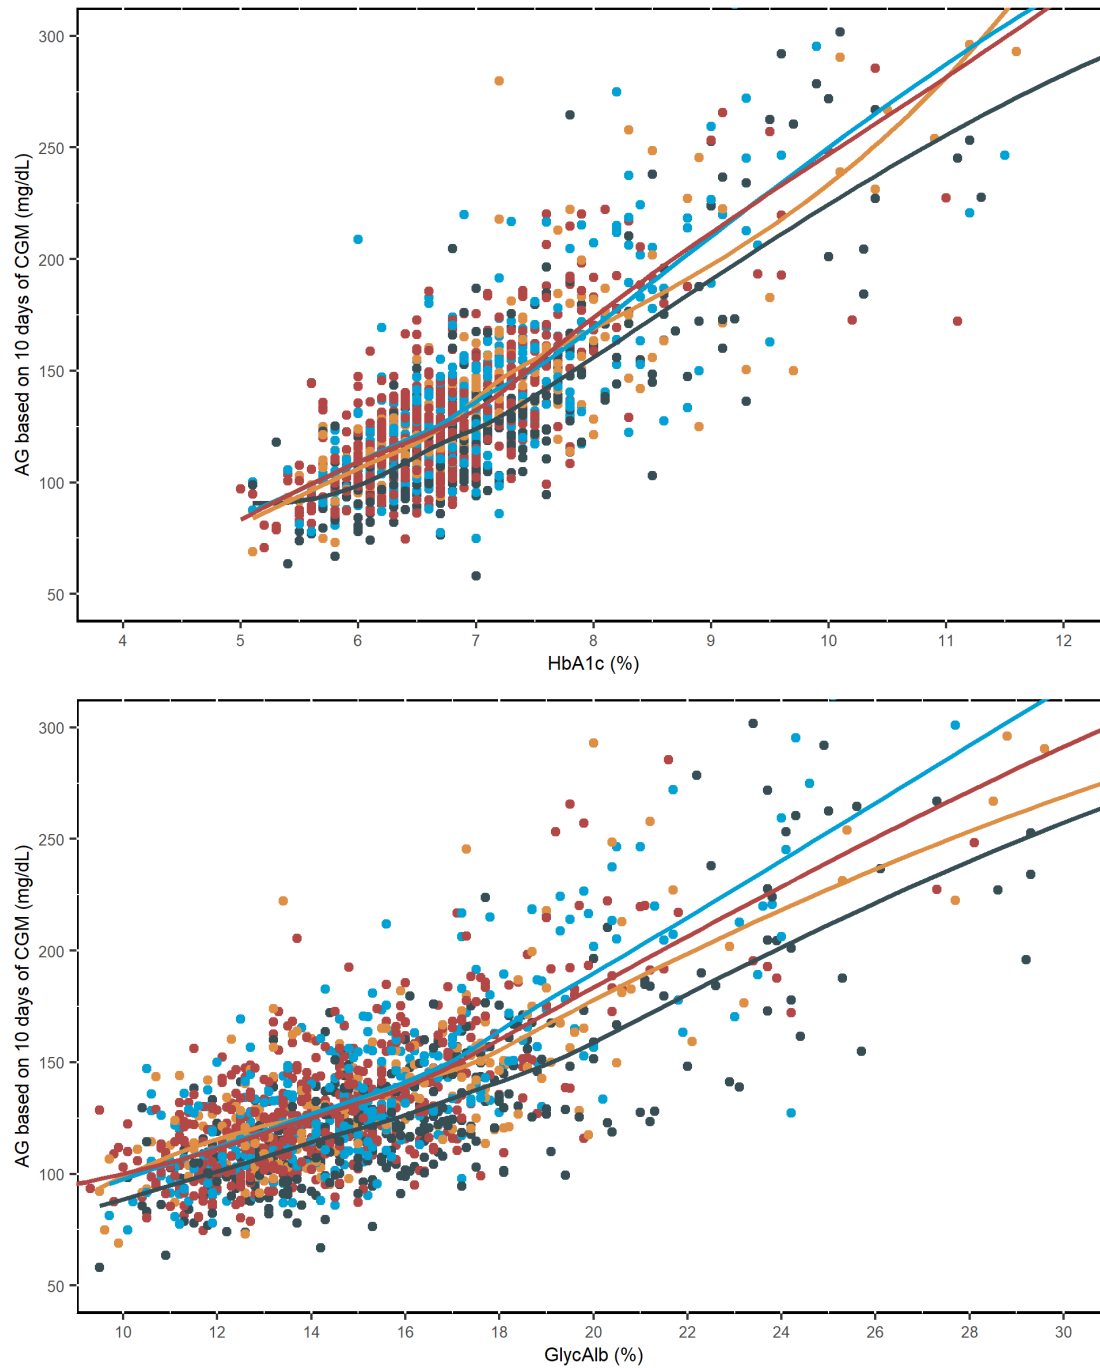

Red = Non-Hispanic White, Black = Non-Hispanic Black, Blue = Hispanic White, Orange = Other races.

To convert values for HbA1c to mmol/mol, multiply by 10.93 and then subtract 23.5.

To convert values for glycated albumin to mmol/mol, add 0.4217 and then divide by 0.05652.

To convert values for glucose to mmol/L, multiply by 0.0555.



**E. Supplement Figure S3 (top). Scatterplot of HbA1c vs. AG<sub>10</sub> by age, with age-specific regression lines overlaid (top). Black <45 years, orange 45-59 years, blue 60+ years. No significant difference between age groups.**

**Supplement Figure S3 (bottom). Scatterplot of HbA1c vs. AG<sub>10</sub> by sex, with sex-specific regression lines overlaid. Black is male, orange is female. The difference in the intercept and slope between sexes is highly significant (2-df joint test of equality,  $p < 0.001$ ).**

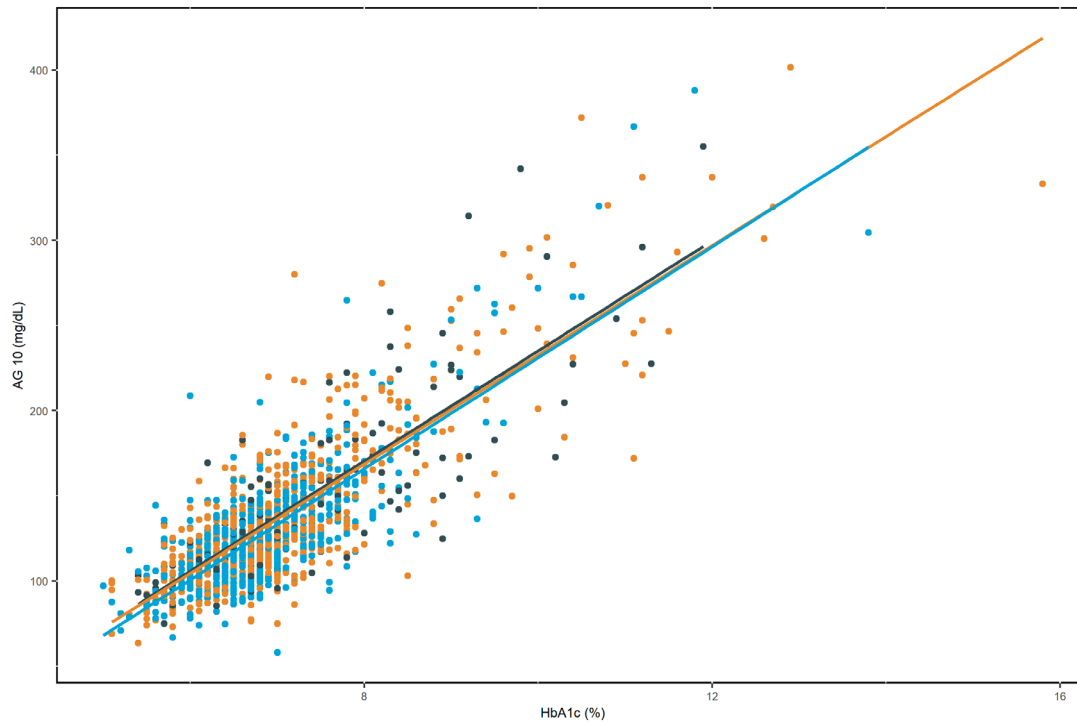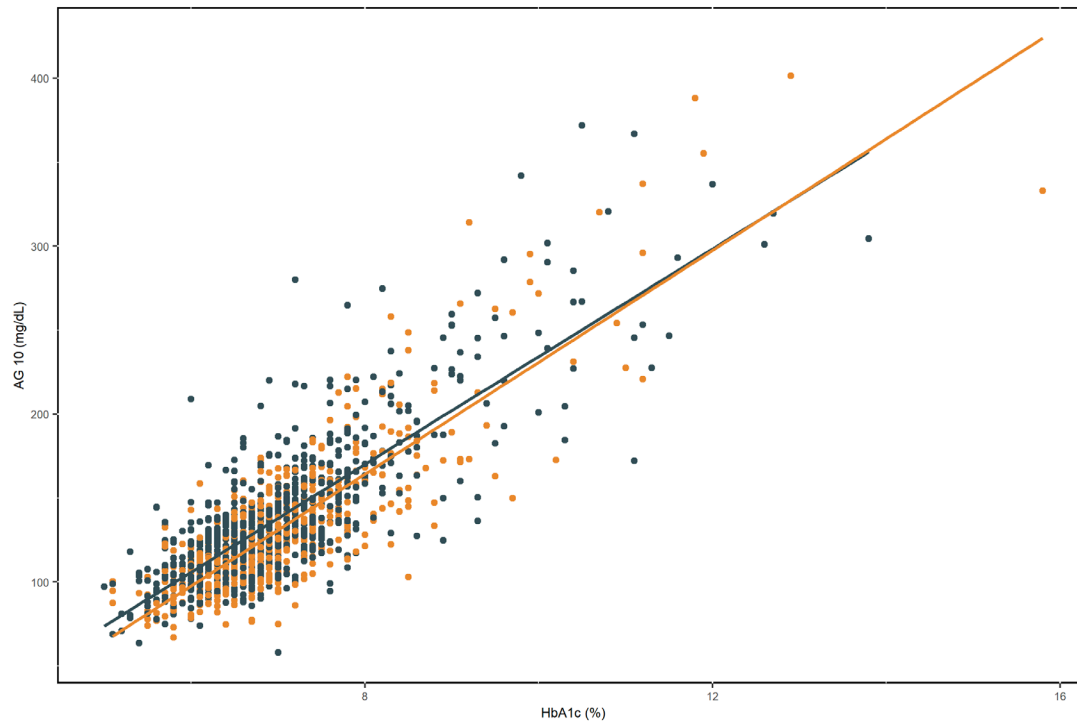

**F: Supplement Table S2. Racial/ethnic differences in the relationships between glycated albumin (%) and average glucose calculated from 10 days of CGM (AG<sub>10</sub>; mg/dL) in a linear regression model**

| Racial Group                              |                      |            |
|-------------------------------------------|----------------------|------------|
|                                           | p<0.001 <sup>†</sup> |            |
|                                           | Intercept            | Slope      |
| Non-Hispanic White                        | -1.2 (5.5)           | 9.1 (0.4)  |
| Non-Hispanic Black                        | -4.7 (4.7)           | 8.4 (0.3)  |
| Hispanic White                            | -20.6 (6.0)          | 10.6 (0.4) |
| Other races                               | 13.4 (6.6)           | 8.2 (0.4)  |
| Pairwise comparisons (p-values)           |                      |            |
| Non-Hispanic White vs. Non-Hispanic Black | <0.001               |            |
| Non-Hispanic White vs. Hispanic White     | 0.01                 |            |
| Non-Hispanic White vs. Other              | 0.23                 |            |
| Non-Hispanic Black vs. Hispanic White     | <0.001               |            |
| Non-Hispanic Black vs. Other              | <0.001               |            |
| Hispanic White vs. Other                  | <0.001               |            |

<sup>†</sup>p-value for a test of the difference among the four groups in the slopes and/or intercepts on 6 degrees of freedom. Other races- Asian American and Pacific Islanders, American Indian or race not identified.

**G. Supplement Table S3. Racial/ethnic differences in the relationships between HbA1c (%) and average glucose (AG) calculated from the full 14 days of CGM as available (AG<sub>14</sub>; mg/dL) (n=1,454), fasting plasma glucose (FPG) from the OGTT, and glucose area under the curve (AUC) from the OGTT in linear regression models.**

| Racial Group                              | AG <sub>14</sub>     |            | FPG                  |            | Glucose AUC          |            |
|-------------------------------------------|----------------------|------------|----------------------|------------|----------------------|------------|
|                                           | p<0.001 <sup>†</sup> |            | p<0.001 <sup>†</sup> |            | p<0.001 <sup>†</sup> |            |
|                                           | Intercept            | Slope      | Intercept            | Slope      | Intercept            | Slope      |
| Non-Hispanic White                        | -86.2 (7.8)          | 31.7 (1.1) | 1.4 (8.8)            | 19.5 (1.3) | 49.5 (15.3)          | 28.3 (2.2) |
| Non-Hispanic Black                        | -90.6 (7.3)          | 31.0 (1.0) | -29.0 (8.5)          | 21.6 (1.2) | 3.4 (13.8)           | 31.2 (1.9) |
| Hispanic White                            | -101.4 (9.0)         | 34.1 (1.2) | -0.1 (10.2)          | 18.7 (1.4) | 61.8 (15.7)          | 26.3 (2.2) |
| Other races                               | -91.6 (10.8)         | 32.5 (1.5) | -21.6 (12.4)         | 21.1 (1.7) | 38.4 (19.4)          | 28.8 (2.7) |
| Pairwise comparisons (p-values)           |                      |            |                      |            |                      |            |
| Non-Hispanic White vs. Non-Hispanic Black | <0.001               |            | <0.001               |            | <0.001               |            |
| Non-Hispanic White vs. Hispanic White     | 0.61                 |            | 0.001                |            | 0.61                 |            |
| Non-Hispanic White vs. Other              | 0.92                 |            | <0.001               |            | 0.07                 |            |
| Non-Hispanic Black vs. Hispanic White     | <0.001               |            | <0.001               |            | <0.001               |            |
| Non-Hispanic Black vs. Other              | <0.001               |            | 0.19                 |            | <0.001               |            |
| Hispanic White vs. Other                  | 0.61                 |            | 0.15                 |            | 0.27                 |            |

<sup>†</sup>p-value for a test of the difference among the four groups in the slopes and/or intercepts on 6 degrees of freedom.

Other races- Asian American and Pacific Islanders, American Indian or race not identified.

**H. Supplement Figure S4. Relationship of (A) HbA1c (%) and (B) glycated albumin (%) with fasting glucose (mg/dl) and of (C) HbA1c and (D) glycated albumin with area under the curve glucose derived from the oral glucose tolerance tests, all by race/ethnicity. Red = Non-Hispanic White, Black = Non-Hispanic Black, Blue = Hispanic White, Orange = Other races. Each of the 4 differences in the intercept and slope comparing NHW and NHB are highly significant ( $p < .001$  for each 2-df joint test of equality).**

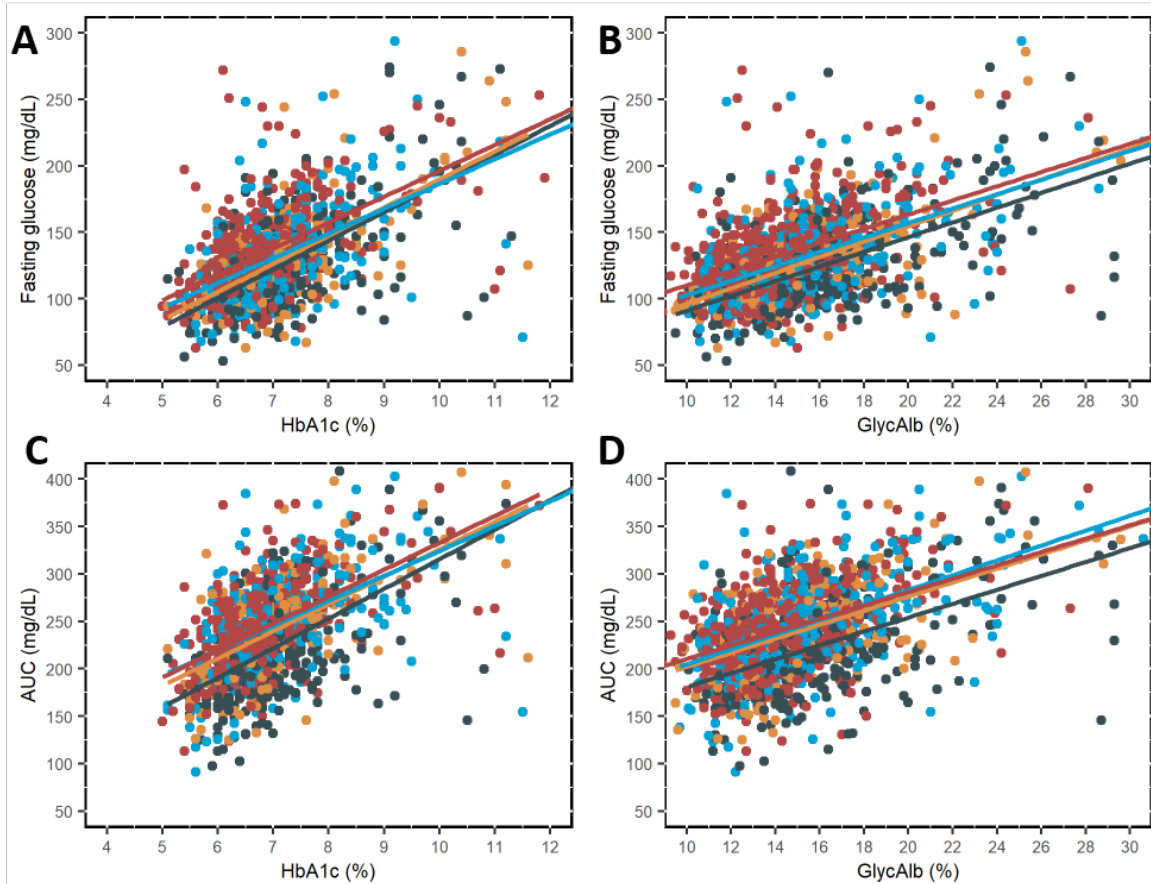

To convert values for HbA1c to mmol/mol, multiply by 10.93 and then subtract 23.5.  
 To convert values for glycated albumin to mmol/mol, add 0.4217 and then divide by 0.05652.  
 To convert values for glucose to mmol/L, multiply by 0.0555.

**I. Supplement Figure S5. Loess curves of the relationship of (A) HbA1c (%) and (B) glycated albumin (%) with fasting glucose levels (mg/dl) and of (C) HbA1c and (D) glycated albumin with area under the curve glucose derived from the oral glucose tolerance tests, all by race/ethnicity. Red = Non-Hispanic White, Black = Non-Hispanic Black, Blue = Hispanic White, Orange = Other races.**

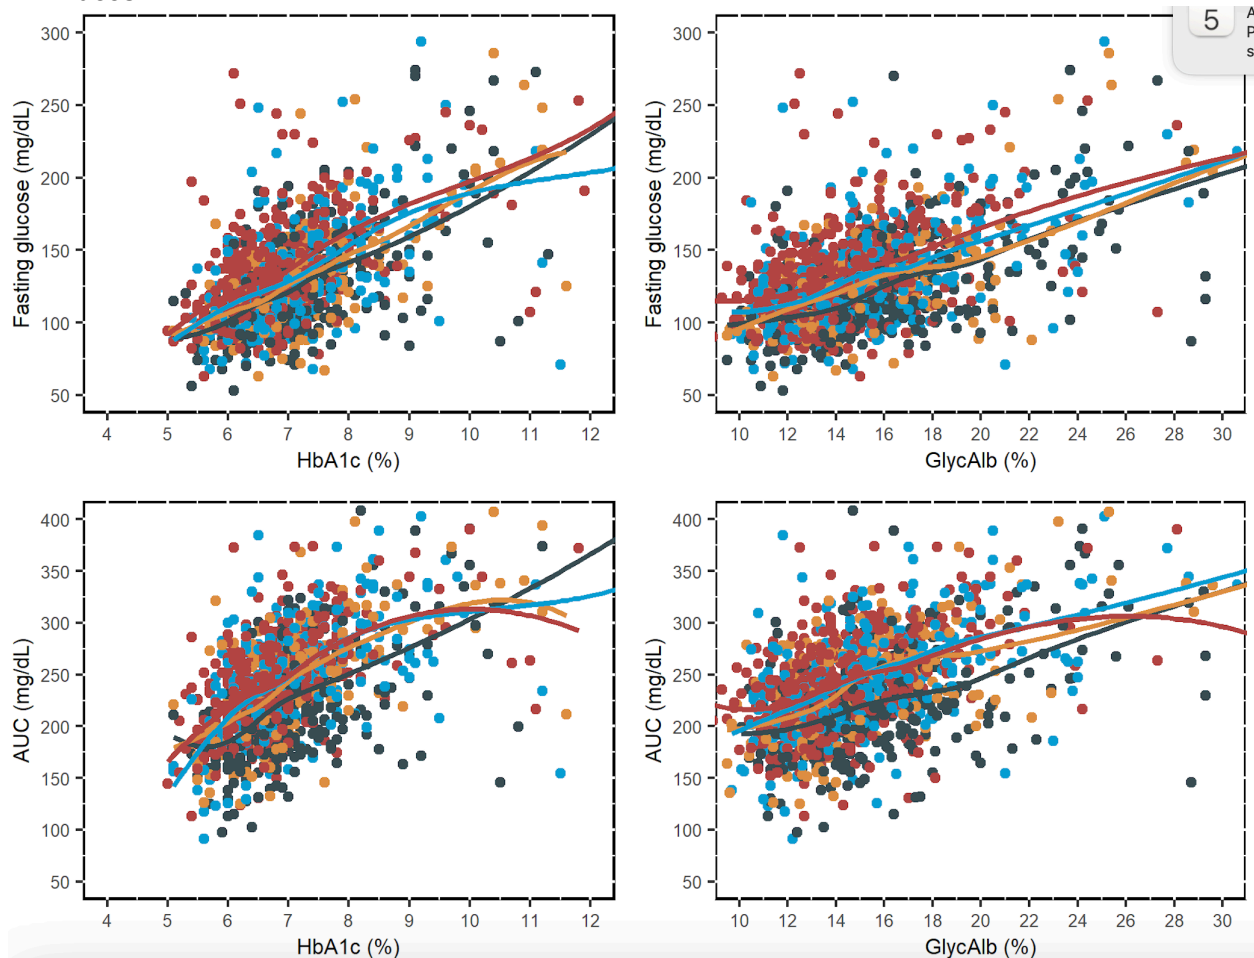

To convert values for HbA1c to mmol/mol, multiply by 10.93 and then subtract 23.5.  
 To convert values for glycated albumin to mmol/mol, add 0.4217 and then divide by 0.05652.  
 To convert values for glucose to mmol/L, multiply by 0.0555

**J. Table S4. Racial/ethnic differences in the relationships between glycated albumin and average glucose (AG) calculated from 14 days of CGM (AG<sub>14</sub>; mg/dL), fasting plasma glucose (FPG) from the OGTT, and glucose area under the curve (AUC) from the OGTT in linear regression models.**

| Racial Group                              | AG <sub>14</sub>     |            | FPG                  |           | Glucose AUC          |           |
|-------------------------------------------|----------------------|------------|----------------------|-----------|----------------------|-----------|
|                                           | p<0.001 <sup>†</sup> |            | p<0.001 <sup>†</sup> |           | p<0.001 <sup>†</sup> |           |
|                                           | Intercept            | Slope      | Intercept            | Slope     | Intercept            | Slope     |
| Non-Hispanic White                        | -0.4 (5.3)           | 9.0 (0.4)  | 56.7 (6.2)           | 5.3 (0.4) | 140.1 (10.3)         | 7.0 (0.7) |
| Non-Hispanic Black                        | -4.1 (4.6)           | 8.3 (0.3)  | 35.7 (5.4)           | 5.5 (0.3) | 107.8 (8.7)          | 7.3 (0.5) |
| Hispanic White                            | -18.5 (5.8)          | 10.3 (0.4) | 48.4 (6.7)           | 5.4 (0.4) | 126.8 (10.6)         | 7.8 (0.7) |
| Other races                               | 7.5 (6.4)            | 8.5 (0.4)  | 37.7 (7.5)           | 5.8 (0.5) | 128.0 (11.9)         | 7.4 (0.7) |
| Pairwise comparisons (p-values)           |                      |            |                      |           |                      |           |
| Non-Hispanic White vs. Non-Hispanic Black | <0.001               |            | <0.001               |           | <0.001               |           |
| Non-Hispanic White vs. Hispanic White     | 0.014                |            | 0.002                |           | 0.624                |           |
| Non-Hispanic White vs. Other              | 0.633                |            | <0.001               |           | 0.188                |           |
| Non-Hispanic Black vs. Hispanic White     | <0.001               |            | <0.001               |           | <0.001               |           |
| Non-Hispanic Black vs. Other              | <0.001               |            | 0.012                |           | <0.001               |           |
| Hispanic White vs. Other                  | 0.004                |            | 0.193                |           | 0.381                |           |

<sup>†</sup>p-value for a test of the difference among the four groups in the slopes and/or intercepts on 6 degrees of freedom.  
Other races- Asian American and Pacific Islanders, American Indian or race not identified.

**K. Table S5. Predicted average glucose levels (AG<sub>10</sub>; mmol/L) for given predicted HbA1c (mmol/mol) by race/ethnicity**

| HbA1c<br>(mmol/mol)                                    | All<br>(n=1454)   | Non-Hispanic White<br>(n=534) | Non-Hispanic Black<br>(n=389) | Hispanic White<br>(n=327) | Other races<br>(n=204) |
|--------------------------------------------------------|-------------------|-------------------------------|-------------------------------|---------------------------|------------------------|
| Average glucose (mmol/L) with 95% prediction interval* |                   |                               |                               |                           |                        |
| 42                                                     | 5.7 (3.1, 8.3)    | 5.8 (3.3, 8.4)                | 5.3 (2.7, 7.9)                | 5.8 (3.2, 8.3)            | 5.8 (3.3, 8.4)         |
| 48                                                     | 6.6 (4.0, 9.2)    | 6.7 (4.2, 9.3)                | 6.2 (3.6, 8.8)                | 6.7 (4.2, 9.3)            | 6.7 (4.2, 9.3)         |
| 53                                                     | 7.5 (4.9, 10.2)   | 7.7 (5.1, 10.2)               | 7.0 (4.5, 9.7)                | 7.7 (5.1, 10.3)           | 7.6 (5.1, 10.2)        |
| 58                                                     | 8.4 (5.8, 11.0)   | 8.5 (6.0, 11.2)               | 7.9 (5.4, 10.5)               | 8.7 (6.1, 11.3)           | 8.5 (5.9, 11.1)        |
| 64                                                     | 9.3 (6.7, 11.9)   | 9.4 (6.9, 12.0)               | 8.8 (6.3, 11.4)               | 9.7 (7.0, 12.2)           | 9.4 (6.8, 12.0)        |
| 69                                                     | 10.2 (7.6, 12.8)  | 10.4 (7.8, 12.9)              | 9.7 (7.2, 12.3)               | 10.6 (8.0, 13.2)          | 10.3 (7.7, 12.9)       |
| 75                                                     | 11.1 (8.5, 13.8)  | 11.3 (8.7, 13.9)              | 10.6 (8.0, 13.2)              | 11.6 (9.0, 14.2)          | 11.2 (8.6, 13.8)       |
| 80                                                     | 12.0 (9.4, 14.7)  | 12.2 (9.6, 14.8)              | 11.5 (8.9, 14.1)              | 12.5 (9.9, 15.2)          | 12.0 (9.4, 14.7)       |
| 86                                                     | 12.9 (10.3, 15.5) | 13.1 (10.5, 15.7)             | 12.4 (9.8, 15.0)              | 13.5 (10.9, 16.2)         | 12.9 (10.3, 15.6)      |

AG<sub>10</sub>- average glucose derived from 10 days of continuous glucose monitoring. Other races- Asian American and Pacific Islanders, American Indian or race not identified. Hemoglobin values (A1C) <6.0 % were not included due to the paucity of observations in that range.

\*95% prediction intervals estimate an individual's AG<sub>10</sub> (mg/dL) based solely upon observation of their HbA1c and racial/ethnic group.

**L. Supplement Table S6. Predicted HbA1c levels (mmol/mol) for given predicted AG<sub>10</sub> (mmol/L) by race/ethnicity**

|                                                                      | All<br>(n=1454) | Non-Hispanic White<br>(n=534) | Non-Hispanic Black<br>(n=389) | Hispanic White<br>(n=327) | Other races<br>(n=204) |
|----------------------------------------------------------------------|-----------------|-------------------------------|-------------------------------|---------------------------|------------------------|
| Predicted HbA1c (mmol/mol) with 95% prediction interval <sup>+</sup> |                 |                               |                               |                           |                        |
| AG <sub>10</sub><br>(mmol/L)                                         |                 |                               |                               |                           |                        |
| 5.6                                                                  | 45 (32, 58)     | 44 (31, 56)                   | 46 (34, 60)                   | 45 (32, 58)               | 45 (32, 57)            |
| 6.9                                                                  | 51 (38, 64)     | 50 (37, 62)                   | 53 (40, 65)                   | 51 (38, 63)               | 51 (38, 63)            |
| 8.3                                                                  | 56 (43, 69)     | 55 (42, 67)                   | 58 (46, 72)                   | 55 (43, 68)               | 56 (44, 69)            |
| 9.7                                                                  | 62 (49, 75)     | 61 (48, 74)                   | 65 (52, 78)                   | 61 (49, 74)               | 62 (50, 75)            |
| 11.1                                                                 | 67 (54, 80)     | 66 (53, 79)                   | 70 (58, 84)                   | 66 (53, 78)               | 68 (55, 80)            |
| 12.5                                                                 | 73 (61, 86)     | 72 (58, 85)                   | 77 (64, 90)                   | 70 (58, 84)               | 74 (61, 87)            |
| 13.9                                                                 | 79 (66, 92)     | 77 (65, 90)                   | 84 (70, 96)                   | 76 (63, 89)               | 79 (67, 92)            |

AG<sub>10</sub>- average glucose derived from 10 days of continuous glucose monitoring. Other races- Asian American and Pacific Islanders or American Indian or race not identified.

\* 95% prediction intervals estimate an individual's HbA1c (%) based solely upon observation of their AG and racial/ethnic group.
